# Supplementary material for: Floral Temperature and Optimal Foraging: Is Heat a Feasible Floral Reward for Pollinators?
Source: PubMed Central journal article supplement (PMC2292243; doi:10.1371/journal.pone.0002007), 2008-04-23

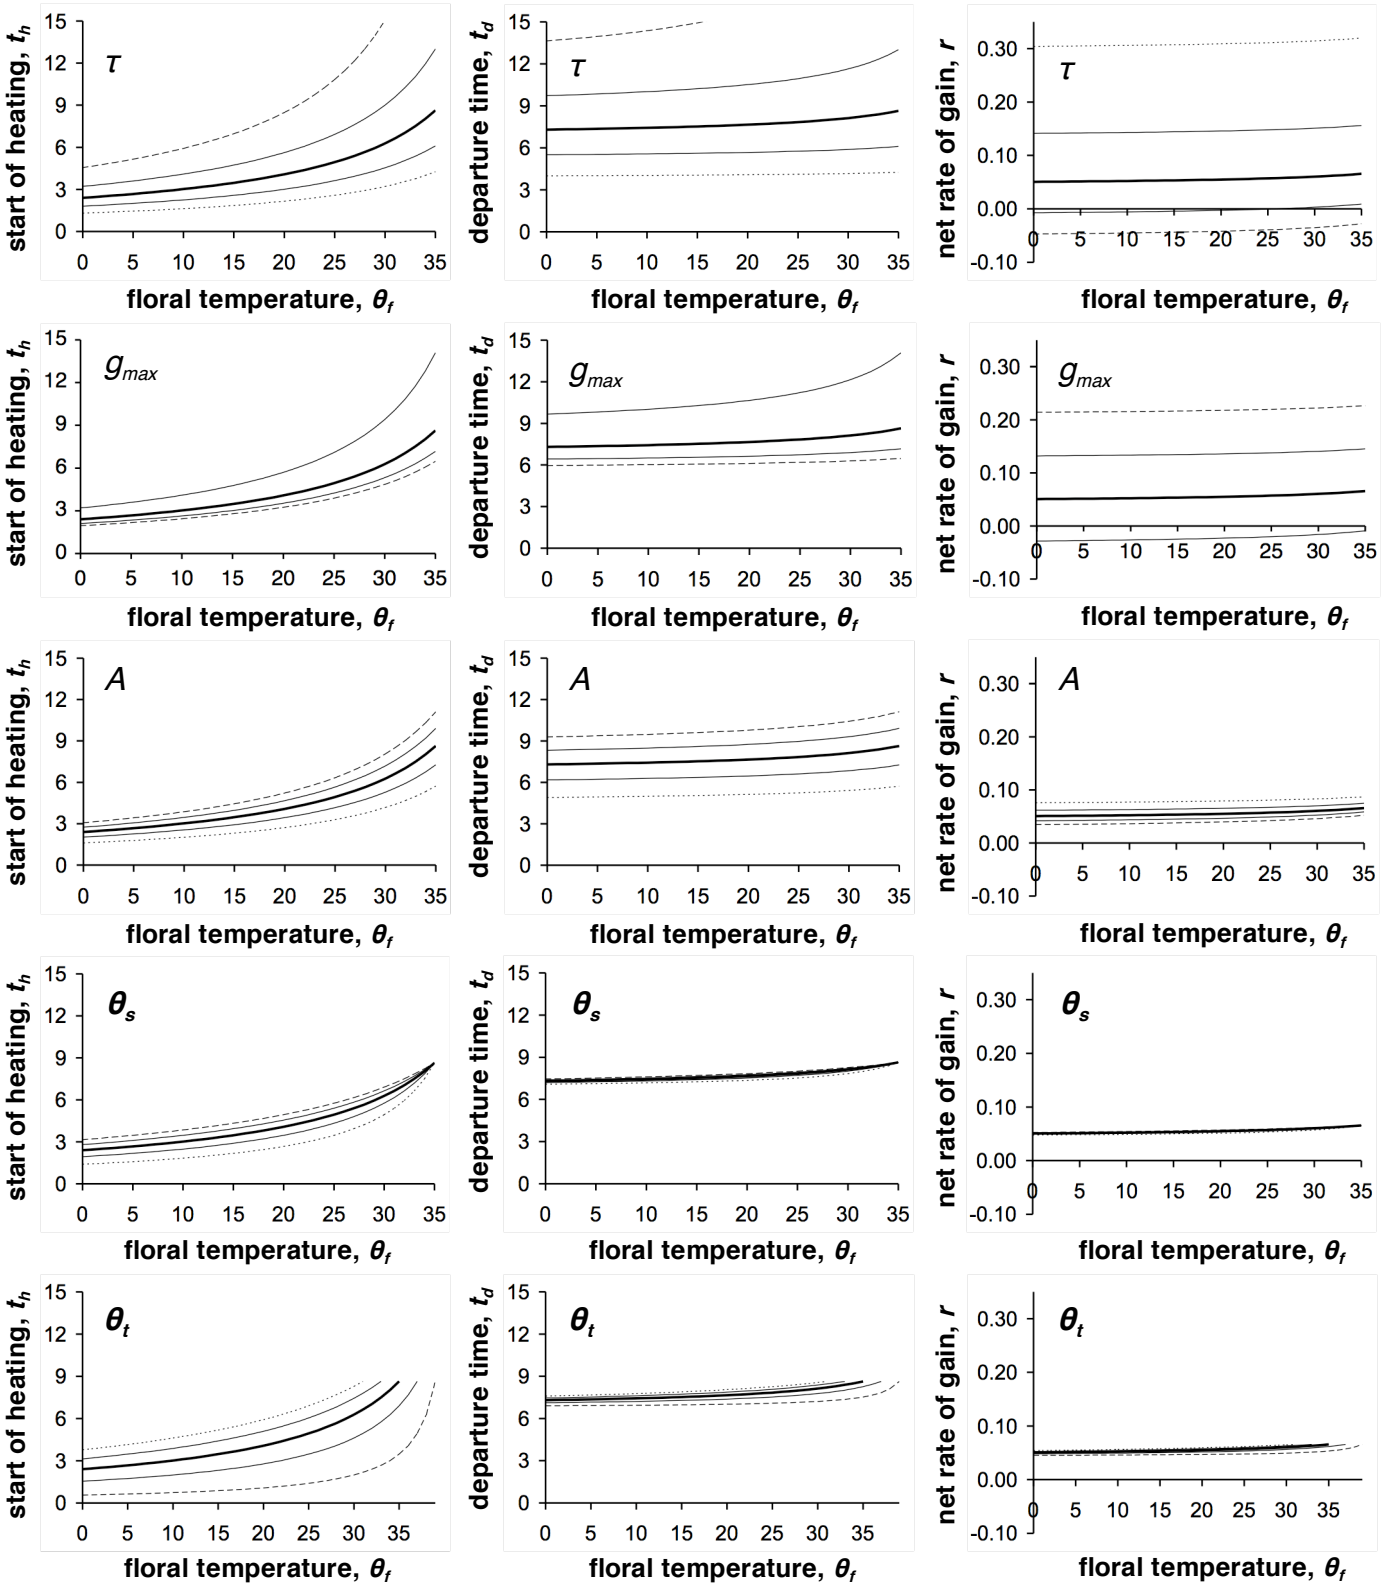

Supplement: pone.0002007.s002.pdf [file pone.0002007.s002.pdf]
